# Supplementary material for: Construction of Co,N-Coordinated Carbon Dots for Efficient Oxygen Reduction Reaction
Source: MDPI journal article supplement (doi:10.3390/molecules27155021), 2022-08-07
Supplement: s1 [file s1]

# Supporting Information

## **Construction of Co,N-Coordinated Carbon Dots on Carbon Black for Efficient Oxygen Reduction Reaction**

Mengying Le <sup>†</sup>, Bingjie Hu <sup>†</sup>, Meiyong Wu, Huazhang Guo and Liang Wang <sup>\*</sup>

Institute of Nanochemistry and Nanobiology, School of Environmental and Chemical Engineering, Shanghai University, 99 Shangda Road, BaoShan District, Shanghai, 200444, China

<sup>\*</sup>Corresponding authors: wangl@shu.edu.cn

<sup>†</sup>These authors contributed equally to this work.

The supporting information file includes 4 Pages and 5 Figures.

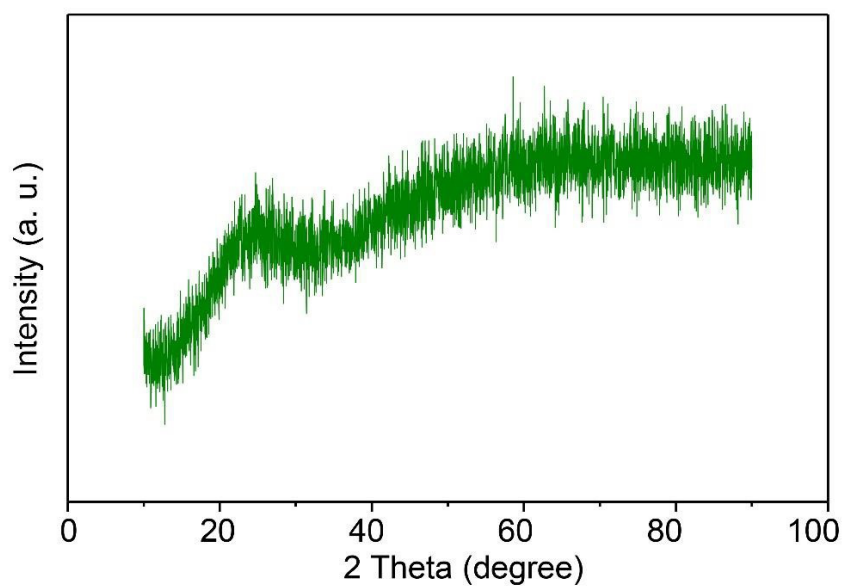

**Figure S1** XRD pattern of Co-CDs.

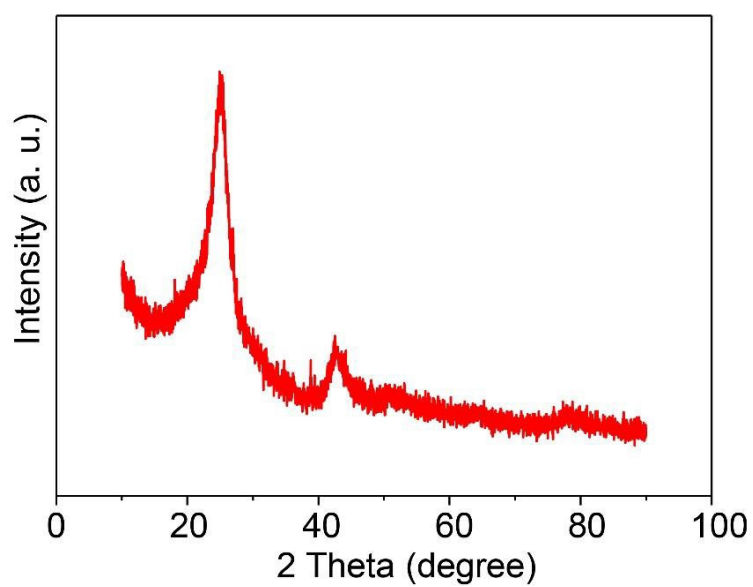

**Figure S2** XRD pattern of Co-CDs@CB.

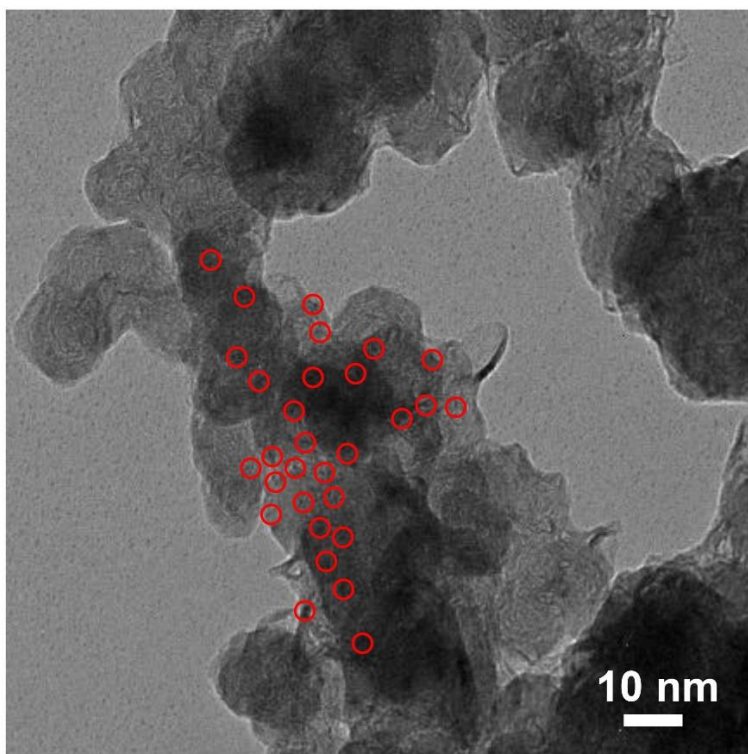

**Figure S3** TEM image of Co-CDs@CB in x70.0 K version, the red circles represent the loaded Co-CDs.

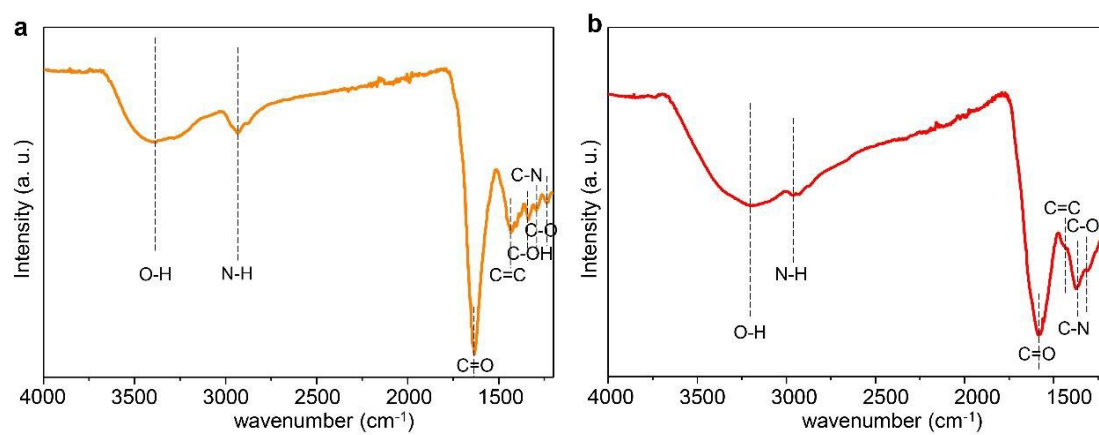

**Figure S4** FTIR spectra of CDs and Co-CDs.

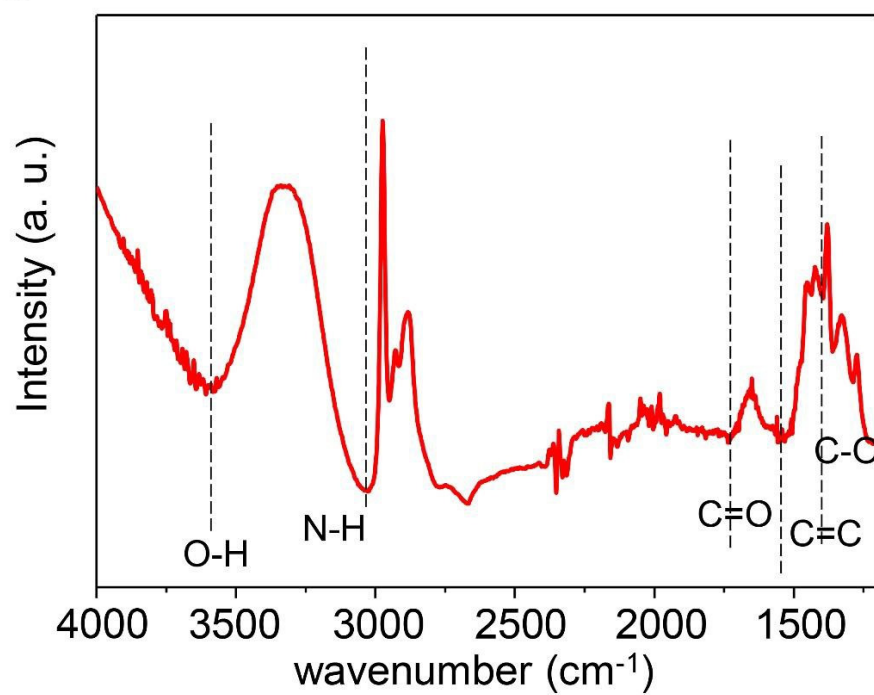

**Figure S5** FTIR spectrum of Co-CDs@CB.
